# Supplementary material
Source: PubMed Central journal article supplement (PMC3582295)
Supplement: cn3001679_si_001.pdf [file cn3001679_si_001.pdf]

## **Supporting Information**

### **Restoration of Glyoxalase Enzyme Activity Precludes Cognitive Dysfunction in a Mouse Model of Alzheimer's Disease**

**Authors:** Swati S. More, Ashish P. Vartak, and Robert Vince\*

#### **Affiliations:**

Center for Drug Design, Academic Health Center, University of Minnesota, Minneapolis, Minnesota 55455.

#### **Corresponding author:**

Professor Robert Vince, Ph.D., Center for Drug Design, 308 Harvard Street SE, 8-123A WDH, Minneapolis, MN 55455, USA. E-mail: vince001@umn.edu Tel: 612 624 9911.

**Determination of methylglyoxal concentration in brain tissue.** Excised brain tissue from Wild type and transgenic Alzheimer's mice was homogenized in a Dounce instrument with the aid of phosphate buffer (pH 7.4, 0.1 M). The resulting homogenates were centrifuged and the supernatant fluid was examined for methylglyoxal content upon derivatization with 1,2-diaminobenzene as follows<sup>14</sup>: a mixture consisting of the supernatant from brain homogenate (200  $\mu$ L), 5 M HClO<sub>4</sub> (50  $\mu$ L), 10 mM aqueous solution of 1,2-diaminobenzene (100  $\mu$ L) and an internal standard consisting of 5-methylquinoxaline (1  $\mu$ M, 50  $\mu$ L) was diluted with water to a final volume of 2 mL. These mixtures were incubated overnight and centrifuged. The supernatant was passed through a C-18 SPE cartridge that had been pretreated by flushing sequentially with 2–4 mL portions of acetonitrile and aqueous KH<sub>2</sub>PO<sub>4</sub> (10 mM, pH = 2.4). The eluates from this process were examined for their 2-methylquinoxaline content utilizing a Beckman Coulter Gold chromatography system with a Varian® Microsorb-MV® 200-5 C-18 column (20 cm, 4.6 mm I.D. and 5  $\mu$ M mean particle diameter). The eluant was a 4:1 volume mixture of 10 mM aqueous KH<sub>2</sub>PO<sub>4</sub> and HPLC grade MeCN, respectively. Chromatography conditions consisted of a detection wavelength of 313 nm, eluant flow rate of 1.0 mL per minute and an average injection volume of 50  $\mu$ L. Samples were analyzed in duplicate and were standardized by comparison with the 2-methylquinoxaline standard, which had a mean retention time of 6.78 minutes under these conditions.

## Supplementary Figures:

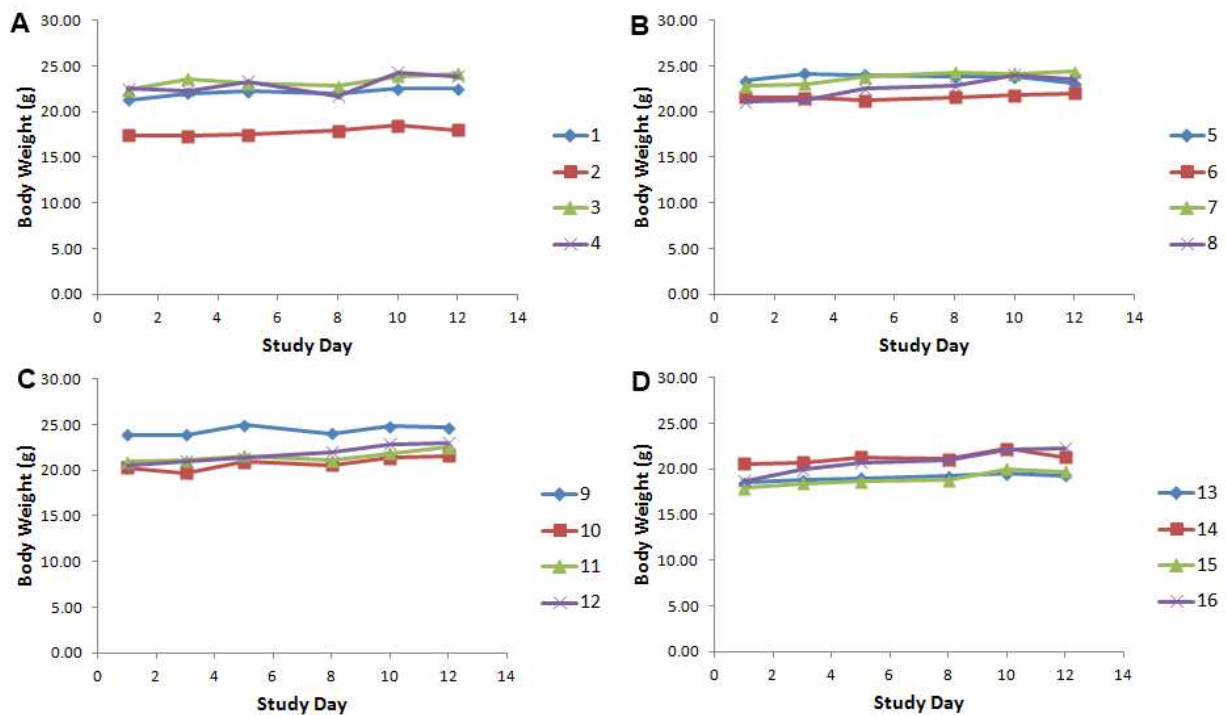

**Figure S1.** Dose determination and short term toxicity study of  $\Psi$ -GSH. Changes in body weights of C57BL/6 mice treated with i.p.  $\Psi$ -GSH at 0 (A), 500 (B), 1000 (C) and 2000 (D) mg/kg doses, 3 $\times$ /week for two weeks. Administration of  $\Psi$ -GSH did not have any effect on body weights of mice. Each graph is represented by individual mouse in each group.

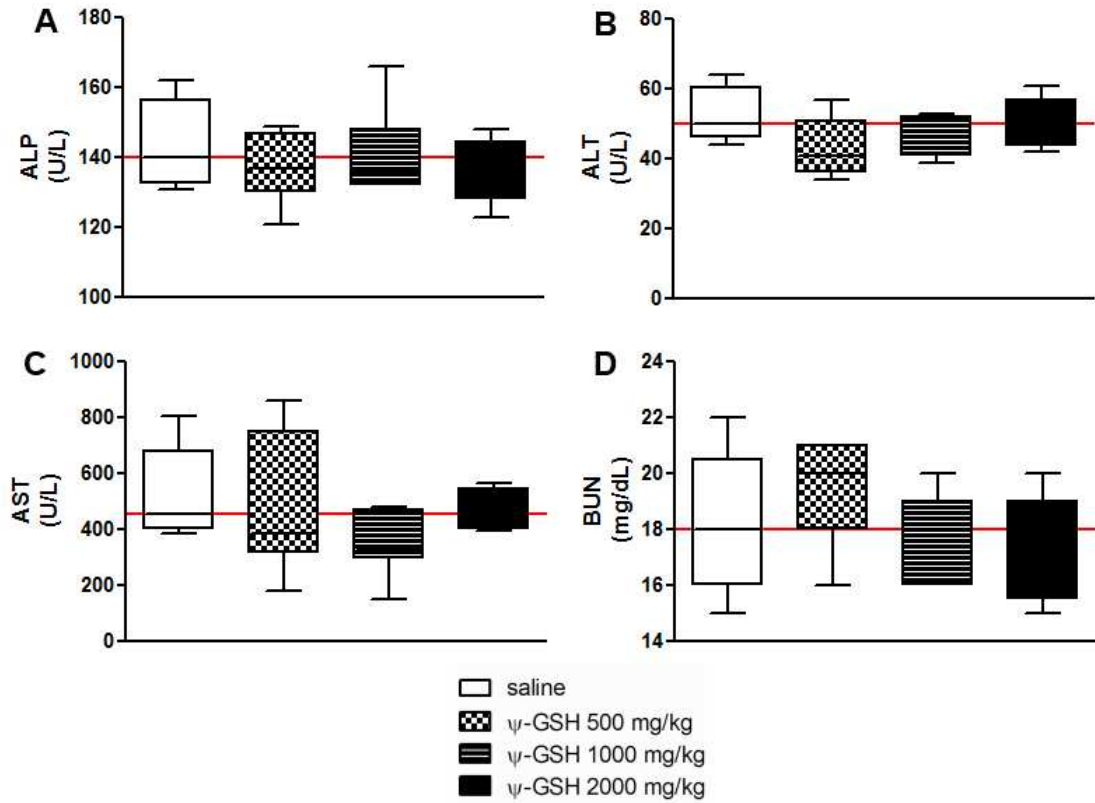

**Figure S2.**  $\Psi$ -GSH treatment (3 $\times$ /week for two weeks) did not affect liver enzyme levels [alkaline phosphatase (ALP, **A**), alanine transaminase (ALT, **B**), and aspartate transaminase (AST, **C**)] and kidney function as represented by blood urea nitrogen (BUN, **D**). Blood creatinine levels in these mice were less than 0.2 mg/dL.

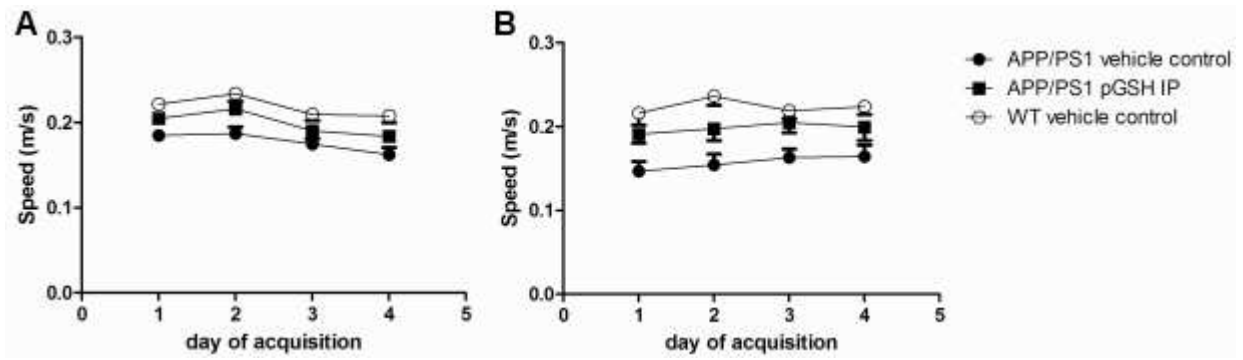

**Figure S3.** There was no effect of  $\Psi$ -GSH on the speeds of mice in the hidden platform (**A**) and the visible platform (**B**) training.

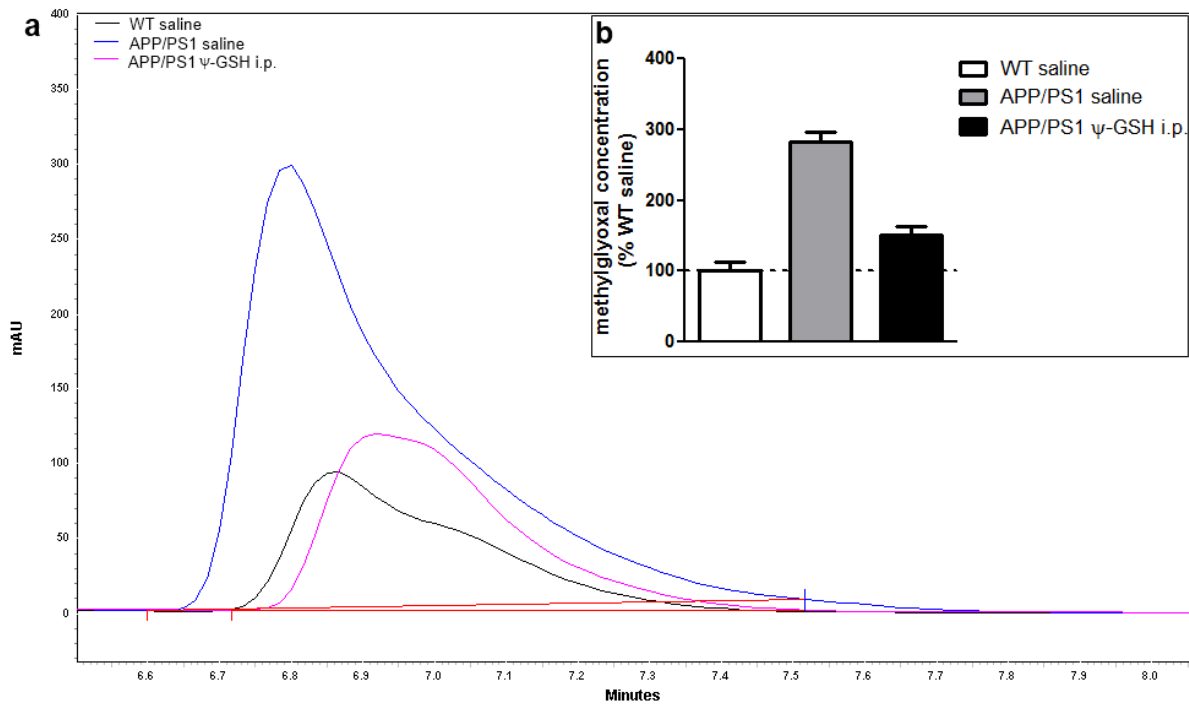

**Figure S4.** Effect of  $\Psi$ -GSH treatment on methylglyoxal concentration in mouse brain. Brains of mice treated and untreated with  $\Psi$ -GSH (WT and APP/PS1 mice) were homogenized in 0.1 M potassium phosphate buffer (pH 7.4). Total concentrations of MG were quantified by HPLC after derivatization with 1,2-diaminobenzene as described in Supporting Materials. The results of this experiment demonstrated that the elevation of MG levels observed in APP/PS1 saline treated mice was diminished by  $\Psi$ -GSH treatment to levels comparable to WT saline treated mice. Figure (a) shows representative HPLC traces of the MG derivative, 2-methylquinoxaline from brain homogenates and figure (b) is a bar graph represented by mean  $\pm$  SEM ( $n = 4$ ) displaying MG concentrations as percentages of MG concentrations in WT saline treated mouse brain homogenates ( $n = 4$ ).
